# Supplementary material for: Chemically modified inulin microparticles serving dual function as a protein antigen delivery vehicle and immunostimulatory adjuvant
Source: Royal Society of Chemistry journal article supplement (doi:10.1039/c5bm00451a), 2016-01-01
Supplement: c5bm00451a1.pdf [file c5bm00451a1.pdf]

## SUPPORTING INFORMATION

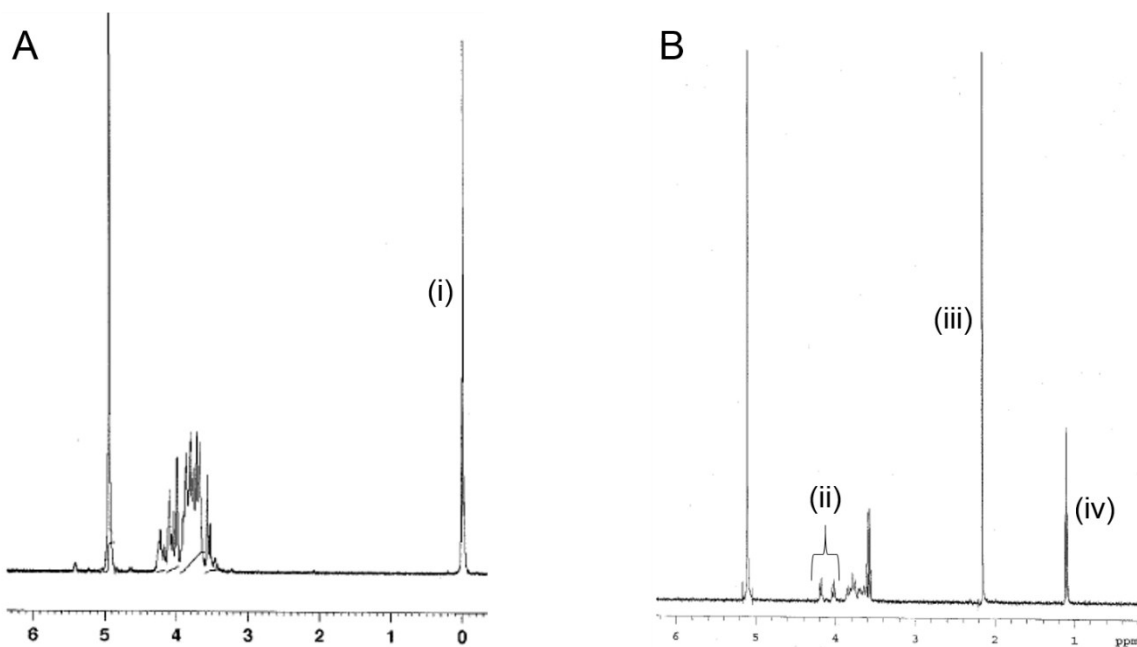

Figure S1. Representative nuclear magnetic resonance spectra for (A) unmodified inulin in pure deuterium oxide and (B) acetalated inulin degraded in 10% v/v deuterium chloride in deuterium oxide. Individual peaks are labeled as follows: (i) tetramethylsilane internal control, (ii) two fructose ring protons, (iii) acetone, and (iv) ethanol.

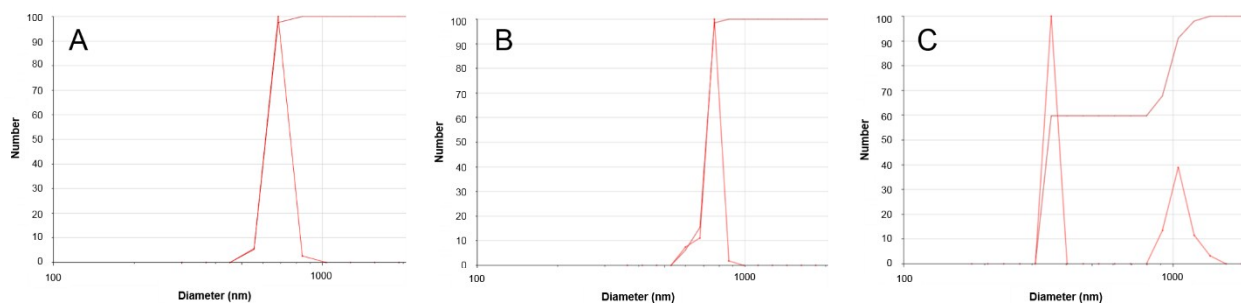

Figure S2. Representative number-weighted size distributions of acetalated inulin (Ace-IN) microparticles with polymer relative cyclic acetal coverages of (A) 0.4% (B) 20.4%, and (C) 26.7%, as determined by dynamic light scattering.

| Treatment         | Microparticle Concentration ( $\mu\text{g/mL}$ ) |     |     |     |                 |
|-------------------|--------------------------------------------------|-----|-----|-----|-----------------|
|                   | 50                                               | 100 | 250 | 500 | 1000            |
| Ace-IN(0.4%) MPs  | $0.25 \pm 0.44$                                  | N/D | N/D | N/D | $0.08 \pm 0.13$ |
| Ace-IN(20.4%) MPs | N/D                                              | N/D | N/D | N/D | N/D             |
| Ace-IN(26.7%) MPs | N/D                                              | N/D | N/D | N/D | N/D             |
|                   |                                                  |     |     |     |                 |
| LPS               | $5.34 \pm 0.33$                                  |     |     |     |                 |
| Unmodified Inulin | N/D                                              |     |     |     |                 |
| Untreated Cells   | N/D                                              |     |     |     |                 |

Table S1. Nitrite concentration ( $\mu\text{M}$ ) released by RAW macrophages after treatment for 48 hrs with Ace-IN(0.4%), Ace-IN(20.4%), and Ace-IN(26.7%) MPs (percent refers to polymer relative cyclic acetal coverage), and unmodified inulin. Unmodified inulin treatment was 1000  $\mu\text{g/mL}$ . Lipopolysaccharide treatment (10  $\mu\text{g/mL}$ ) for 8 hr. N/D = not detectable. Data are presented as mean  $\pm$  standard deviation (n = 3).
